# Supplementary material
Source: PubMed Central journal article supplement (PMC6439603)

## Supplementary Online Content

Shaker MS, Greenhawt MJ. Analysis of value-based costs of undesignated school stock epinephrine policies for peanut anaphylaxis. *JAMA Pediatr*. Published online December 21, 2018. doi:10.1001/jamapediatrics.2018.4275

### **eFigure.** Simulation Health States

This supplementary material has been provided by the authors to give readers additional information about their work.

**e Figure 1. Simulation Health States.** Cohorts of school children with peanut allergy were analyzed under various school-based epinephrine availability paradigms. The upper panel shows the model stem and the three strategies compared, with the health state transition diagram displayed in the lower panel. In each simulation children assumed annual risks of allergic reactions, with a ten-fold risk reduction in fatality assumed if school-based epinephrine was available.

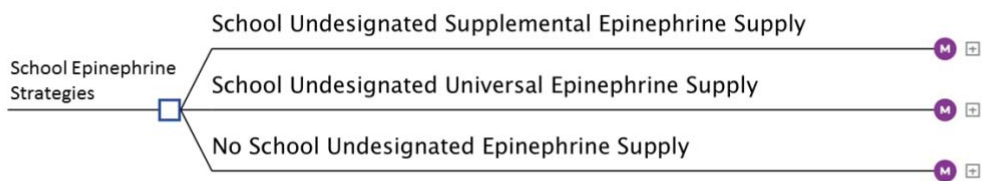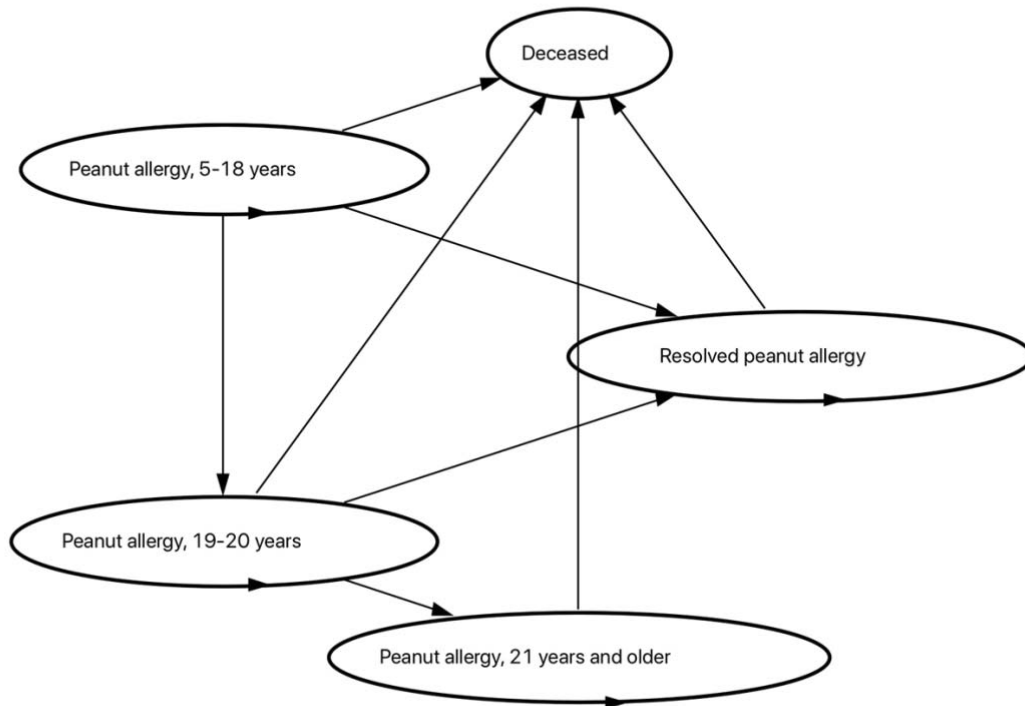

Supplement: jamapediatr-173-169-s001.pdf [file jamapediatr-173-169-s001.pdf]
